# Supplementary material
Source: publisher site journal article supplement (https://www.kjim.org/upload/media/kjim-2022-283_suppl2.pdf)
Supplement: Supplementary file 1 [file kjim-2022-283_suppl2.pdf]

**Supplementary Table 2. Number needed to screen to detect diabetes according to age group**

| Age group, yr | KNHANES       |                                |     |     | NHIS-NSC      |                                |     |     |
|---------------|---------------|--------------------------------|-----|-----|---------------|--------------------------------|-----|-----|
|               | No. of people | Screening-positive individuals |     | NNS | No. of people | Screening-positive individuals |     | NNS |
|               |               | No.                            | %   |     |               | No.                            | %   |     |
| 20–24         | 3,241,699     | 23,107                         | 0.7 | 143 | 18,635        | 103                            | 0.6 | 167 |
| 25–29         | 3,178,659     | 37,034                         | 1.2 | 83  | 43,252        | 316                            | 0.7 | 143 |
| 30–34         | 3,059,687     | 47,893                         | 1.6 | 63  | 39,224        | 545                            | 1.4 | 71  |
| 35–39         | 3,615,732     | 106,112                        | 2.9 | 34  | 35,900        | 872                            | 2.4 | 42  |
| 40–44         | 3,554,636     | 143,959                        | 4.0 | 25  | 66,376        | 1,707                          | 2.6 | 38  |
| 45–49         | 3,972,430     | 205,521                        | 5.2 | 19  | 46,659        | 1,736                          | 3.7 | 27  |
| 50–54         | 3,568,192     | 260,040                        | 7.3 | 14  | 55,904        | 2,287                          | 4.1 | 24  |
| 55–59         | 3,462,634     | 234,657                        | 6.8 | 15  | 34,348        | 1,521                          | 4.4 | 23  |
| 60–64         | 2,624,983     | 214,022                        | 8.2 | 12  | 30,938        | 1,400                          | 4.5 | 22  |
| 65–69         | 1,754,349     | 141,080                        | 8.0 | 13  | 18,330        | 834                            | 4.5 | 22  |
| 70–74         | 1,235,052     | 114,570                        | 9.3 | 11  | 16,824        | 721                            | 4.3 | 23  |
| ≥ 75          | 1,883,120     | 183,076                        | 9.7 | 10  | 11,378        | 562                            | 4.9 | 20  |

Values are presented as weighted numbers in the KNHANES.

KNHANES, Korea National Health and Nutrition Examination Survey; NHIS-NSC, National Health Insurance Service-National Sample Cohort; NNS, number needed to screen.
